# Supplementary material for: Sound Scattering by Gothic Piers and Columns of the Cathédrale Notre-Dame de Paris
Source: MDPI journal article supplement (doi:10.3390/acoustics4030041), 2022-08-26
Supplement: s1 [file s1]

# Supplementary Materials: Sound scattering from the Gothic piers and columns of the Cathédrale Notre-Dame de Paris

Antoine Weber , Brian F.G. Katz 

## 1. Wave field simulation videos

The videos have been recorded from the hybrid finite-volume finite-difference time-domain method simulations. Only a rectilinear sub-sampling of the hexagonal spatial grid, resulting in more than 14 points per meter in the horizontal and vertical directions. This causes visible spatial-aliasing, yet still allows good visualization of the scattering. The field in very close proximity to the cylindrical obstacles, *i.e.* in the finite volume mesh, is not recorded. They are included as MPEG4 files.

## 2. Impulse responses

The impulse responses have been obtained from the simulations. They correspond to receiver positions at 3 m from the center of the cylinders, for the back ( $\theta_s = 180^\circ$ ) and transverse ( $\theta_s = 90^\circ$ ) scattering. They have been equalized with a minimum phase inverse filter constructed from the free-field impulse responses to avoid coloration from the Ricker pulse used as a source signal. This provides a flat magnitude spectrum up to 5 kHz. They all have been resampled to 48 kHz and normalized to their maximum absolute value. They are included as WAV files.
