# Supplementary material for: Sound Scattering by Gothic Piers and Columns of the Cathédrale Notre-Dame de Paris
Source: MDPI journal article supplement (doi:10.3390/acoustics4030041), 2022-08-26
Supplement: s1 [file s1]

Archive with 25 entries (25 files):
- C1_0.mp4
- C1_90.mp4
- C2_0.mp4
- C2_90.mp4
- Ch_0.mp4
- IR_C1_0_backscat.wav
- IR_C1_0_transverscat.wav
- IR_C2_0_backscat.wav
- IR_C2_0_transverscat.wav
- IR_CircCylNave_backscat.wav
- IR_CircCylNave_transverscat.wav
- IR_FreeField.wav
- IR_N1_90_backscat.wav
- IR_N1_90_transverscat.wav
- IR_N3_15_backscat.wav
- IR_N3_15_transverscat.wav
- IR_T_90_backscat.wav
- IR_T_90_transverscat.wav
- N1_90.mp4
- N2_45.mp4
- N2_90.mp4
- N3_0.mp4
- SupplementaryMaterials.pdf
- T_0.mp4
- T_90.mp4
